# Supplementary material for: Photophysical analysis of dual fluorescence and phosphorescence emissions observed for semi-aliphatic polyimides at lower temperatures
Source: Royal Society of Chemistry journal article supplement (doi:10.1039/d4cp00538d), 2024-01-01
Supplement: d4cp00538d1.pdf [file d4cp00538d1.pdf]

## Supplementary Information

# Photophysical Analysis of Dual Fluorescence and Phosphorescence Emissions Observed for Semi-Aliphatic Polyimides at Lower Temperatures

Mayuko Nara<sup>a</sup>, Eisuke Fujiwara<sup>a</sup>, Aurimas Vyšniauskas<sup>b</sup>,

Vidmantas Gulbinas<sup>b\*</sup>, and Shinji Ando<sup>a\*</sup>

<sup>a</sup> Department of Chemical Science and Engineering, Tokyo Institute of Technology,  
Ookayama 2-12-1-E4-5, Meguro-ku, Tokyo 152-8552, Japan

<sup>b</sup> Center for Physical Sciences and Technology, Sauletekio av. 3, Vilnius 10257, Lithuania

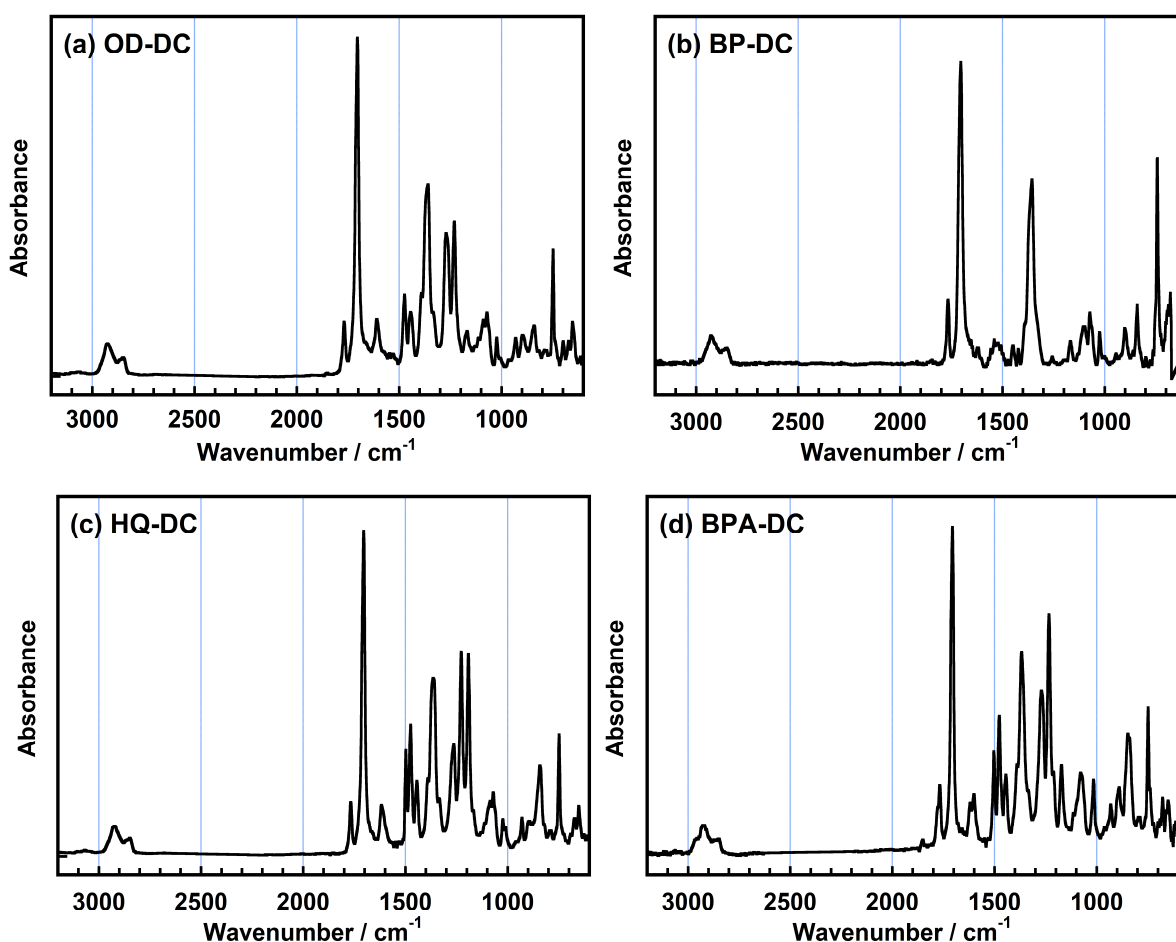

**Figure S1.** ATR-FT-IR spectra of polyimide films (PIs) depicted in **Chart 1**,  
(a) OD-DC, (b) BP-DC, (c) HQ-DC, and (d) BPA-DC.

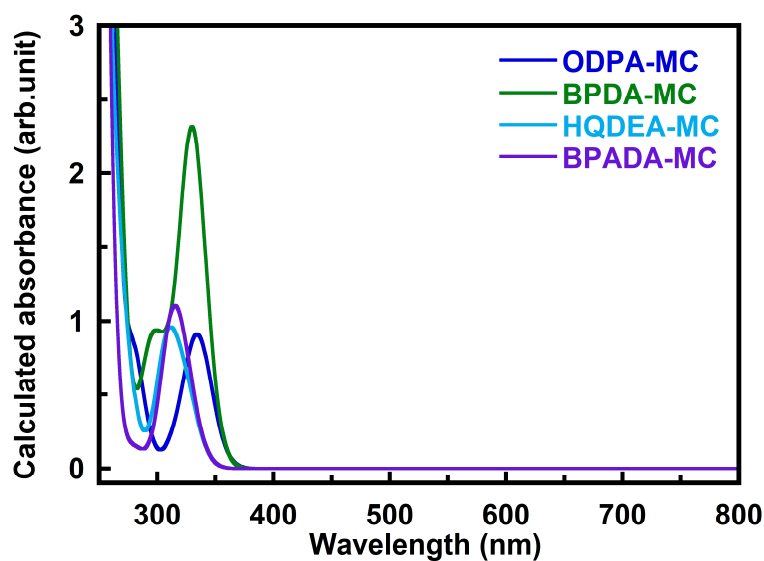

**Figure S2.** Calculated absorption spectra of the model compounds depicted in **Chart 2**.

**Table S1.** In-plane ( $n_{TE}$ ), out-of-plane ( $n_{TM}$ ), average refractive indices ( $n_{av}$ ), and in-plane/out-of-plane birefringence of the polyimides (PIs) measured at 1310 nm, molecular weights ( $M_w$ ), Van-der-Waals volume ( $V_{vdw}$ ) ( $\text{\AA}^3$ ), molecular polarizability ( $\text{\AA}^3$ ) of model compounds (MCs), and molecular packing coefficients ( $K_p$ ) of the PIs.

| Polyimide | Refractive index |          |          | Birefringence | Calculated data for MCs |           |                | Packing Coeffs. |
|-----------|------------------|----------|----------|---------------|-------------------------|-----------|----------------|-----------------|
|           | $n_{TE}$         | $n_{TM}$ | $n_{av}$ | $\Delta n$    | $M_w$                   | $V_{vdw}$ | Polarizability | $K_p$           |
| OD-DC     | 1.5753           | 1.5695   | 1.5734   | 0.0058        | 486.55                  | 438.27    | 55.64          | 0.6200          |
| BP-DC     | 1.6003           | 1.5896   | 1.5967   | 0.0107        | 470.55                  | 429.68    | 55.56          | 0.6288          |
| HQ-DC     | 1.5788           | 1.5771   | 1.5782   | 0.0017        | 578.64                  | 518.56    | 67.30          | 0.6106          |
| BPA-DC    | 1.5797           | 1.5773   | 1.5789   | 0.0024        | 696.81                  | 641.04    | 83.48          | 0.6092          |

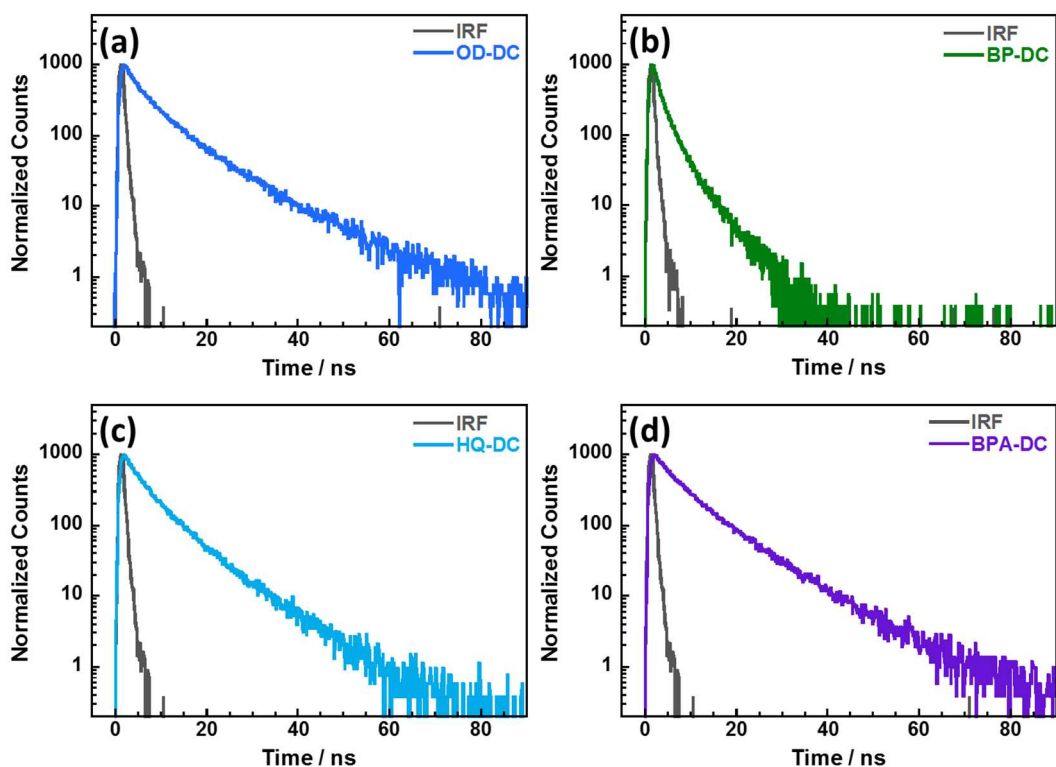

**Figure S3.** Fluorescence decay curves of (a) OD-DC, (b) BP-DC, (c) HQ-DC, (d) BPA-DC.

**Table S2.** Transition wavelengths, oscillator strengths ( $f$ ), contribution of molecular orbitals, and assignment of one electron transitions of imide model compounds (MCs) calculated by the TD-DFT theory.

| Imide compound | State          | Transition wavelength/nm | Oscillator strength, $f$ | Orbitals |          | Assignment        |
|----------------|----------------|--------------------------|--------------------------|----------|----------|-------------------|
| OD-MC          | S <sub>1</sub> | 339.6                    | 0.0808                   | HOMO     | → LUMO   | LE( $\pi-\pi^*$ ) |
|                | S <sub>2</sub> | 324.7                    | 0.0008                   | HOMO-3   | → LUMO   | LE( $n-\pi^*$ )   |
|                | S <sub>3</sub> | 323.3                    | 0.0021                   | HOMO-2   | → LUMO   | LE( $n-\pi^*$ )   |
| BP-MC          | S <sub>1</sub> | 335.5                    | 0.2195                   | HOMO     | → LUMO   | LE( $\pi-\pi^*$ ) |
|                | S <sub>2</sub> | 330.0                    | 0.0002                   | HOMO-2   | → LUMO   | LE( $n-\pi^*$ )   |
|                | S <sub>3</sub> | 329.2                    | 0.0104                   | HOMO-3   | → LUMO   | CT( $\pi-\pi^*$ ) |
| HQ-MC          | S <sub>1</sub> | 348.1                    | 0.0775                   | HOMO     | → LUMO   | LE( $\pi-\pi^*$ ) |
|                | S <sub>2</sub> | 336.6                    | 0.0446                   | HOMO     | → LUMO+1 | LE( $\pi-\pi^*$ ) |
|                | S <sub>3</sub> | 331.1                    | 0.0004                   | HOMO-5   | → LUMO   | LE( $n-\pi^*$ )   |
| BPA-MC         | S <sub>1</sub> | 340.4                    | 0.0542                   | HOMO     | → LUMO   | LE( $\pi-\pi^*$ ) |
|                | S <sub>2</sub> | 335.5                    | 0.0338                   | HOMO-1   | → LUMO+1 | LE( $\pi-\pi^*$ ) |
|                | S <sub>3</sub> | 328.4                    | 0.0002                   | HOMO-6   | → LUMO   | LE( $n-\pi^*$ )   |

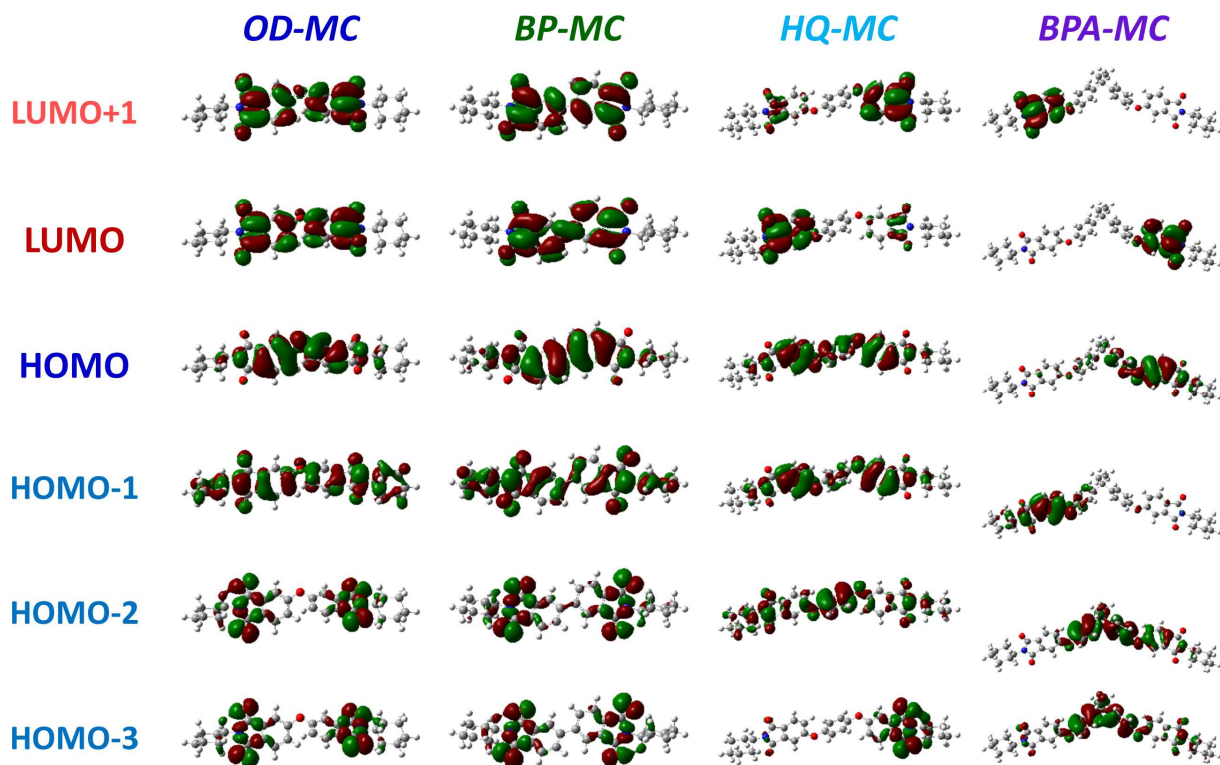

**Figure S4.** Spatial distributions of the molecular orbitals of imide model compounds (MCs) calculated by the DFT theory.

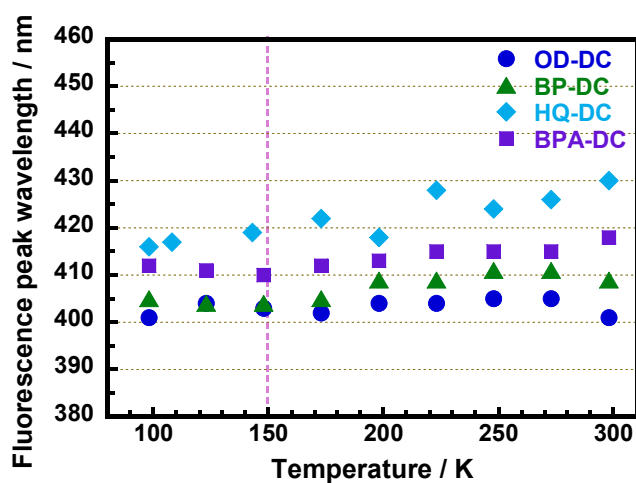

**Figure S5.** Temperature dependence of the fluorescence wavelength of the PI films.

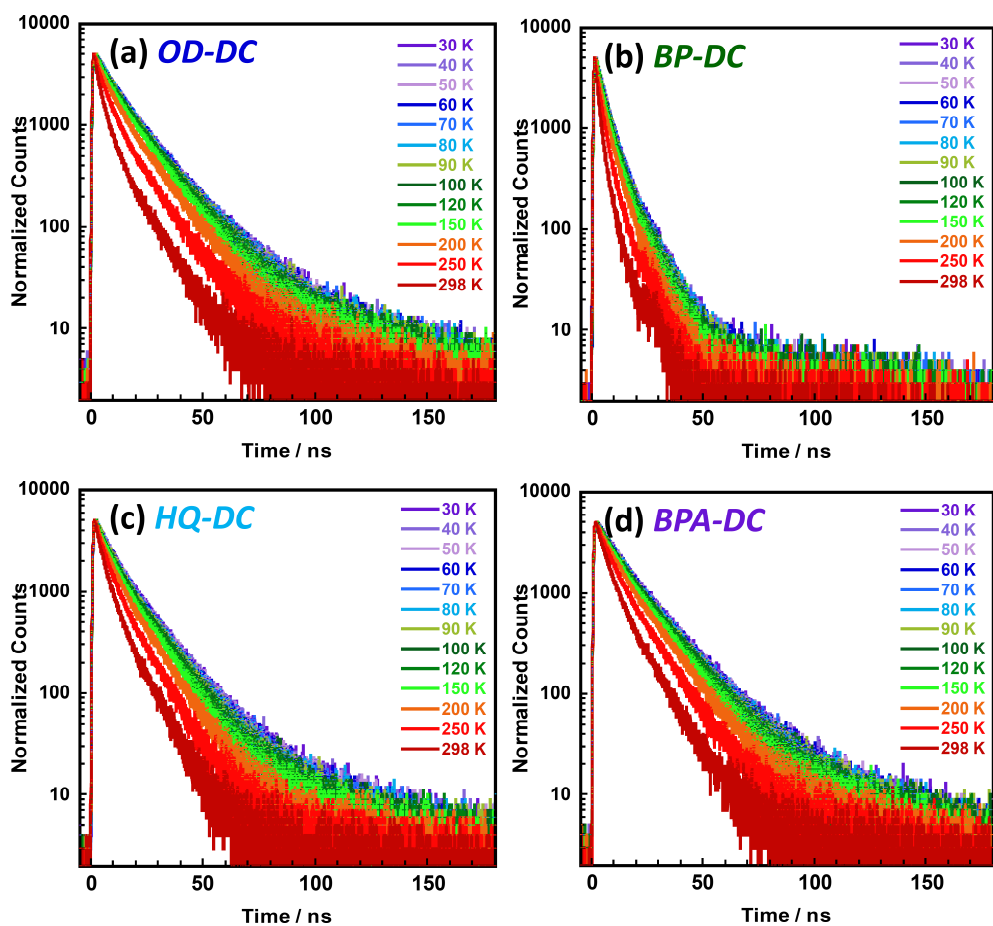

**Figure S6.** FL decay curves of (a) OD-DC, (b) BP-DC, (c) HQ-DC, and (d) BPA-DC at variable temperatures.

**Table S3.** Fitting parameters and phosphorescence (PH) lifetimes of the PH decay curve of OD-DC at each temperature.  $\tau_p$  is the average PH lifetime.

| Temp. / K | $\chi$ | $\tau_p$ / ms | $\tau_1$ / ms | $\tau_2$ / ms | $A_1$ | $A_2$ |
|-----------|--------|---------------|---------------|---------------|-------|-------|
| 180       | 1.0    | 97.3          | 22.2          | 130           | 72    | 28    |
| 170       | 1.2    | 136           | 30.1          | 199           | 80    | 20    |
| 160       | 1.2    | 180           | 36.9          | 247           | 76    | 24    |
| 150       | 1.2    | 233           | 51.8          | 300           | 68    | 32    |
| 140       | 1.1    | 309           | 85.6          | 397           | 65    | 35    |
| 130       | 1.3    | <b>369</b>    | 96.3          | 457           | 61    | 39    |
| 120       | 1.1    | 425           | 113           | 509           | 55    | 45    |
| 110       | 1.2    | 485           | 143           | 571           | 50    | 50    |
| 100       | 1.1    | 538           | 184           | 632           | 48    | 52    |
| 90        | 1.1    | 577           | 190           | 658           | 42    | 58    |
| 80        | 1.2    | 619           | 230           | 702           | 39    | 61    |

**Table S4.** Fitting parameters and phosphorescence (PH) lifetimes of the PH decay curve of BP-DC at each temperature.  $\tau_p$  is the average PH lifetime.

| Temp. / K | $\chi$ | $\tau_p$ / ms | $\tau_1$ / ms | $\tau_2$ / ms | $A_1$ | $A_2$ |
|-----------|--------|---------------|---------------|---------------|-------|-------|
| 140       | 1.1    | 83.0          | 15.0          | 88.4          | 32    | 68    |
| 130       | 0.8    | <b>167</b>    | 21.8          | 188           | 55    | 45    |
| 120       | 0.8    | 268           | 45.7          | 334           | 69    | 31    |
| 110       | 1.0    | 303           | 67.9          | 346           | 48    | 52    |
| 100       | 0.9    | 366           | 91.1          | 422           | 49    | 51    |
| 90        | 0.9    | 435           | 34.2          | 458           | 44    | 56    |
| 80        | 1.0    | 515           | 92.6          | 557           | 37    | 63    |

**Table S5.** Fitting parameters and phosphorescence (PH) lifetimes of the PH decay curve of HQ-DC at each temperature.  $\tau_p$  is the average PH lifetime.

| Temp. / K | $\chi$ | $\langle\tau\rangle$ / ms | $\tau_1$ / ms | $\tau_2$ / ms | $A_1$ | $A_2$ |
|-----------|--------|---------------------------|---------------|---------------|-------|-------|
| 150       | 1.0    | 176                       | 32.4          | 243           | 78    | 22    |
| 140       | 1.1    | 211                       | 35.6          | 267           | 71    | 29    |
| 130       | 1.0    | <b>296</b>                | 62.2          | 392           | 72    | 28    |
| 120       | 1.1    | 342                       | 75.6          | 427           | 64    | 36    |
| 110       | 1.1    | 415                       | 107           | 501           | 57    | 43    |
| 100       | 1.0    | 475                       | 139           | 571           | 54    | 46    |
| 90        | 1.1    | 527                       | 158           | 621           | 50    | 50    |
| 80        | 1.2    | 577                       | 157           | 661           | 46    | 54    |

**Table S6.** Fitting parameters and phosphorescence (PH) lifetimes of the PH decay curve of BPA-DC at each temperature.  $\tau_p$  is the average PH lifetime.

| Temp. / K | $\chi$ | $\langle\tau\rangle$ / ms | $\tau_1$ / ms | $\tau_2$ / ms | $A_1$ | $A_2$ |
|-----------|--------|---------------------------|---------------|---------------|-------|-------|
| 180       | 1.1    | 71.2                      | 18.8          | 100           | 74    | 25    |
| 170       | 1.0    | 123                       | 32.2          | 177           | 77    | 23    |
| 160       | 1.3    | 179                       | 40.8          | 235           | 70    | 30    |
| 150       | 1.2    | 255                       | 65.3          | 336           | 68    | 32    |
| 140       | 1.1    | 325                       | 86.5          | 410           | 63    | 387   |
| 130       | 1.2    | <b>397</b>                | 116           | 481           | 55    | 45    |
| 120       | 1.1    | 466                       | 139           | 555           | 52    | 48    |
| 110       | 1.1    | 520                       | 153           | 606           | 48    | 52    |
| 100       | 1.1    | 569                       | 180           | 658           | 45    | 55    |
| 90        | 1.1    | 614                       | 219           | 708           | 44    | 56    |
| 80        | 1.1    | 657                       | 241           | 745           | 40    | 60    |

**Table S7.** Fitting parameters and fluorescence (FL) lifetimes of the FL decay curve of OD-DC at each temperature.  $\tau_F$  is the average FL lifetime.

| Temp. / K | $\chi$ | $\tau_F$ / ns | $\tau_1$ / ns | $\tau_2$ / ns | $A_1$ | $A_2$ |
|-----------|--------|---------------|---------------|---------------|-------|-------|
| 373       | 3.6    | 1.34          | 0.82          | 4.8           | 87    | 13    |
| 350       | 3.5    | 2.07          | 1.2           | 6.1           | 82    | 18    |
| 298       | 1.18   | 4.4           | 2.63          | 10.6          | 77    | 23    |
| 250       | 1.16   | 7.1           | 4.04          | 13.2          | 67    | 33    |
| 200       | 1.12   | 9.7           | 5.95          | 15.6          | 61    | 39    |
| 150       | 1.10   | 11.4          | 7.43          | 17.1          | 59    | 41    |
| 120       | 1.09   | 12.2          | 8.29          | 17.9          | 60    | 40    |
| 100       | 1.11   | 12.4          | 8.55          | 18.3          | 60    | 40    |
| 90        | 1.07   | 12.6          | 8.70          | 18.3          | 60    | 40    |
| 80        | 1.08   | 12.7          | 8.95          | 18.7          | 62    | 38    |
| 70        | 1.10   | 12.8          | 9.00          | 18.8          | 62    | 38    |
| 60        | 1.06   | 12.9          | 9.09          | 18.8          | 61    | 39    |
| 50        | 1.06   | 12.9          | 9.22          | 19.0          | 62    | 38    |
| 40        | 1.16   | 12.6          | 9.17          | 18.0          | 61    | 39    |
| 30        | 1.09   | 13.0          | 9.27          | 19.6          | 62    | 38    |

**Table S8.** Fitting parameters and fluorescence (FL) lifetimes of the FL decay curve of BP-DC at each temperature.  $\tau_F$  is the average FL lifetime.

| Temp. / K | $\chi$ | $\tau_F$ / ns | $\tau_1$ / ns | $\tau_2$ / ns | $A_1$ | $A_2$ |
|-----------|--------|---------------|---------------|---------------|-------|-------|
| 373       | 2.4    | 0.50          | 0.37          | 2.08          | 93    | 7     |
| 350       | 2.6    | 0.64          | 0.47          | 2.53          | 92    | 8     |
| 298       | 0.77   | 1.5           | 1.00          | 4.19          | 83    | 17    |
| 250       | 0.88   | 2.5           | 1.53          | 5.35          | 75    | 25    |
| 200       | 0.89   | 3.5           | 2.17          | 6.39          | 68    | 32    |
| 150       | 0.91   | 4.2           | 2.69          | 7.15          | 67    | 33    |
| 120       | 0.96   | 4.5           | 2.93          | 7.43          | 66    | 34    |
| 100       | 0.95   | 4.6           | 3.03          | 7.66          | 66    | 34    |
| 90        | 0.91   | 4.7           | 3.17          | 7.80          | 67    | 33    |
| 80        | 0.93   | 4.7           | 3.14          | 7.80          | 67    | 33    |
| 70        | 0.94   | 4.8           | 3.28          | 8.00          | 69    | 31    |
| 60        | 0.94   | 4.7           | 3.17          | 7.88          | 67    | 33    |
| 50        | 0.92   | 4.8           | 3.23          | 7.94          | 67    | 33    |
| 40        | 0.92   | 4.8           | 3.32          | 8.03          | 67    | 33    |
| 30        | 0.93   | 4.9           | 3.39          | 8.15          | 69    | 31    |

**Table S9.** Fitting parameters and fluorescence (FL) lifetimes of the FL decay curve of HQ-DC at each temperature.  $\tau_F$  is the average FL lifetime.

| Temp. / K | $\chi$ | $\tau_F$ / ns | $\tau_1$ / ns | $\tau_2$ / ns | $A_1$ | $A_2$ |
|-----------|--------|---------------|---------------|---------------|-------|-------|
| 373       | 1.1    | 2.39          | 1.68          | 5.28          | 80    | 20    |
| 350       | 1.2    | 3.06          | 2.08          | 6.17          | 76    | 23    |
| 298       | 1.01   | 4.8           | 2.91          | 8.93          | 68    | 32    |
| 250       | 1.16   | 6.6           | 3.91          | 13.2          | 63    | 37    |
| 200       | 1.12   | 8.3           | 4.99          | 15.6          | 60    | 40    |
| 150       | 1.10   | 9.6           | 5.94          | 17.1          | 57    | 43    |
| 120       | 1.09   | 10.2          | 6.46          | 17.9          | 58    | 42    |
| 100       | 1.11   | 10.6          | 6.80          | 18.3          | 58    | 42    |
| 90        | 1.07   | 10.7          | 6.77          | 18.3          | 56    | 44    |
| 80        | 1.08   | 10.6          | 6.28          | 18.7          | 56    | 44    |
| 70        | 1.10   | 11.0          | 6.97          | 18.8          | 56    | 44    |
| 60        | 1.06   | 11.1          | 7.25          | 18.8          | 58    | 42    |
| 50        | 1.06   | 11.2          | 7.15          | 19.0          | 56    | 44    |
| 40        | 1.16   | 11.4          | 7.46          | 18.0          | 57    | 43    |
| 30        | 1.08   | 11.5          | 7.52          | 16.9          | 58    | 42    |

**Table S10.** Fitting parameters and fluorescence (FL) lifetimes of the FL decay curve of BPA-DC at each temperature.  $\tau_F$  is the average FL lifetime.

| Temp. / K | $\chi$ | $\tau_F$ / ns | $\tau_1$ / ns | $\tau_2$ / ns | $A_1$ | $A_2$ |
|-----------|--------|---------------|---------------|---------------|-------|-------|
| 373       | 1.0    | 2.81          | 1.89          | 5.9           | 77    | 23    |
| 350       | 1.1    | 3.88          | 2.71          | 7.7           | 77    | 23    |
| 298       | 1.00   | 6.3           | 4.03          | 10.9          | 66    | 34    |
| 250       | 1.07   | 8.8           | 5.62          | 13.5          | 59    | 41    |
| 200       | 1.03   | 10.9          | 7.32          | 15.9          | 57    | 43    |
| 150       | 1.11   | 12.3          | 8.49          | 17.2          | 56    | 44    |
| 120       | 1.06   | 12.9          | 9.00          | 17.9          | 57    | 43    |
| 100       | 1.07   | 13.2          | 9.23          | 18.1          | 56    | 44    |
| 90        | 1.04   | 13.4          | 9.65          | 18.7          | 58    | 42    |
| 80        | 1.10   | 13.5          | 9.53          | 18.6          | 57    | 43    |
| 70        | 1.08   | 13.6          | 9.50          | 18.5          | 55    | 45    |
| 60        | 1.05   | 13.7          | 9.83          | 18.9          | 57    | 43    |
| 50        | 1.06   | 13.8          | 9.97          | 19.0          | 57    | 43    |
| 40        | 1.06   | 13.8          | 9.97          | 19.1          | 58    | 42    |
| 30        | 1.10   | 13.8          | 10.0          | 19.3          | 58    | 42    |
